# Supplementary material for: The impact of emotional support on healthcare workers and students coping with COVID-19, and other SARS-CoV pandemics – a mixed-methods systematic review
Source: PubMed Central journal article supplement (PMC10339499; doi:10.1186/s12913-023-09744-6), 2023-07-13
Supplement: 12913_2023_9744_MOESM1_ESM.pdf [file 12913_2023_9744_MOESM1_ESM.pdf]

**Online only material 1.** Quality evaluation of selected RCT studies (n=4)

|                   | Randomization | Concealment of allocation | Treatment groups similar at the baseline | Participants were blinded | Treatment deliverers were blinded | Outcomes assessors were blinded | Study groups treated identically, except for intervention | Follow-up complete | Intention-to-treat analysis | Outcomes measured in the same way in all groups | Outcomes measured in a reliable way | Appropriate statistical analysis | Trial design appropriate for the topic | The percentage of compliance with the quality criteria |
|-------------------|---------------|---------------------------|------------------------------------------|---------------------------|-----------------------------------|---------------------------------|-----------------------------------------------------------|--------------------|-----------------------------|-------------------------------------------------|-------------------------------------|----------------------------------|----------------------------------------|--------------------------------------------------------|
| Amsalen 2022      | √             | √                         | √                                        | ?                         | x                                 | ?                               | √                                                         | √                  | √                           | √                                               | √                                   | √                                | √                                      | 69%                                                    |
| Coifman 2021      | √             | √                         | √                                        | √                         | x                                 | ?                               | √                                                         | ?                  | √                           | √                                               | x                                   | √                                | √                                      | 69%                                                    |
| Fiol-DeRoque 2021 | √             | √                         | √                                        | √                         | x                                 | √                               | √                                                         | √                  | √                           | √                                               | √                                   | √                                | √                                      | 92%                                                    |
| Procaccia 2021    | ?             | ?                         | ?                                        | x                         | x                                 | x                               | ?                                                         | x                  | √                           | √                                               | x                                   | √                                | √                                      | 31%                                                    |

√: Yes; x: No; ?: Unclear; NA: Not applicable
