# Supplementary material for: The impact of emotional support on healthcare workers and students coping with COVID-19, and other SARS-CoV pandemics – a mixed-methods systematic review
Source: PubMed Central journal article supplement (PMC10339499; doi:10.1186/s12913-023-09744-6), 2023-07-13
Supplement: 12913_2023_9744_MOESM2_ESM.pdf [file 12913_2023_9744_MOESM2_ESM.pdf]

**Online only material 2.** Quality evaluation of selected Quasi-experimental studies (n=2)

|              | Cause and effect variables | Participants from the compared groups | Other exposures/treatments occurring in the same time | Control group | Multiple measurements of the outcomes | Complete follow-up | Outcomes measured in the same way | Outcomes measured in a reliable way | Statistical analysis | The percentage of compliance with the quality criteria |
|--------------|----------------------------|---------------------------------------|-------------------------------------------------------|---------------|---------------------------------------|--------------------|-----------------------------------|-------------------------------------|----------------------|--------------------------------------------------------|
| Chochol 2021 | √                          | √                                     | ?                                                     | x             | √                                     | √                  | √                                 | √                                   | x                    | 67%                                                    |
| Chen 2006    | √                          | √                                     | √                                                     | x             | √                                     | √                  | √                                 | √                                   | √                    | 89%                                                    |

√: Yes; x: No; ?: Unclear; NA: Not applicable
