# Supplementary material for: The impact of emotional support on healthcare workers and students coping with COVID-19, and other SARS-CoV pandemics – a mixed-methods systematic review
Source: PubMed Central journal article supplement (PMC10339499; doi:10.1186/s12913-023-09744-6), 2023-07-13
Supplement: 12913_2023_9744_MOESM3_ESM.pdf [file 12913_2023_9744_MOESM3_ESM.pdf]

**Online only material 3.** Quality evaluation of selected Cross-sectional studies (n=6)

|               | Clear inclusion criteria | Detailed description of subjects and setting | Exposure measured in a valid and reliable way | Standard criteria used for measurement of the condition | Confounding factors identified | Strategies to deal with confounding factors | Outcomes measured in a valid and reliable way | Appropriate statistical analysis | The percentage of compliance with the quality criteria |
|---------------|--------------------------|----------------------------------------------|-----------------------------------------------|---------------------------------------------------------|--------------------------------|---------------------------------------------|-----------------------------------------------|----------------------------------|--------------------------------------------------------|
| Blake 2020    | √                        | √                                            | ?                                             | x                                                       | x                              | x                                           | √                                             | √                                | 50%                                                    |
| Geoffroy 2020 | ?                        | √                                            | ?                                             | NA                                                      | NA                             | NA                                          | NA                                            | √                                | 25%                                                    |
| Monette 2020  | √                        | √                                            | √                                             | √                                                       | x                              | x                                           | x                                             | √                                | 62%                                                    |
| Petrella      | √                        | √                                            | √                                             | √                                                       | x                              | x                                           | √                                             | √                                | 75%                                                    |
| Sockalingam   | √                        | √                                            | √                                             | √                                                       | x                              | x                                           | x                                             | √                                | 62%                                                    |
| Teall         | √                        | x                                            | x                                             | NA                                                      | NA                             | NA                                          | x                                             | x                                | 12%                                                    |

√: Yes; x: No; ?: Unclear; NA: Not applicable
