# Supplementary material for: The impact of emotional support on healthcare workers and students coping with COVID-19, and other SARS-CoV pandemics – a mixed-methods systematic review
Source: PubMed Central journal article supplement (PMC10339499; doi:10.1186/s12913-023-09744-6), 2023-07-13
Supplement: 12913_2023_9744_MOESM4_ESM.pdf [file 12913_2023_9744_MOESM4_ESM.pdf]

**Online only material 4.** Quality evaluation of selected Qualitative studies (n=3)

|                    | Congruity between philosophical perspective and methodology | Congruity between methodology and the objectives | Congruity between methodology and methods used to collect data | Congruity between methodology and representation and analysis of data | Congruity between methodology and the interpretation | Statement locating the researcher culturally or theoretically | Influence of the researcher on the research | Participants adequately represented | Ethical research | Conclusions report flow from the data analysis | The percentage of compliance with the quality criteria |
|--------------------|-------------------------------------------------------------|--------------------------------------------------|----------------------------------------------------------------|-----------------------------------------------------------------------|------------------------------------------------------|---------------------------------------------------------------|---------------------------------------------|-------------------------------------|------------------|------------------------------------------------|--------------------------------------------------------|
| Blake 2021         | √                                                           | √                                                | √                                                              | √                                                                     | √                                                    | x                                                             | x                                           | √                                   | √                | ?                                              | 70%                                                    |
| Vera San Juan 2020 | √                                                           | √                                                | √                                                              | √                                                                     | √                                                    | x                                                             | x                                           | √                                   | √                | √                                              | 80%                                                    |
| Yoon               | √                                                           | √                                                | √                                                              | √                                                                     | √                                                    | x                                                             | x                                           | √                                   | √                | ?                                              | 70%                                                    |

√: Yes; x: No; ?: Unclear; NA: Not applicable
