# Supplementary material for: The impact of emotional support on healthcare workers and students coping with COVID-19, and other SARS-CoV pandemics – a mixed-methods systematic review
Source: PubMed Central journal article supplement (PMC10339499; doi:10.1186/s12913-023-09744-6), 2023-07-13
Supplement: 12913_2023_9744_MOESM5_ESM.pdf [file 12913_2023_9744_MOESM5_ESM.pdf]

**Online only material 5.** Quality evaluation of selected Systematic Reviews (n=4)

|          | Clear and explicit review question | Appropriate inclusion criteria | Appropriate search strategy | Adequate information sources | Appropriate critical appraisal | Critical appraisal by two or more reviewers | Methods to minimize errors in data extraction | Appropriate methods used to combine studies | Publication bias assessment | Recommendations for policy and/or practice supported by the reported data | Appropriate specific directives for new research | The percentage of compliance with the quality criteria |
|----------|------------------------------------|--------------------------------|-----------------------------|------------------------------|--------------------------------|---------------------------------------------|-----------------------------------------------|---------------------------------------------|-----------------------------|---------------------------------------------------------------------------|--------------------------------------------------|--------------------------------------------------------|
| Ardekani | ?                                  | ?                              | ✓                           | ✓                            | ✓                              | ✓                                           | ✓                                             | ?                                           | NA                          | ✓                                                                         | ✓                                                | 64%                                                    |
| Buselli  | ✓                                  | ✓                              | ?                           | ✓                            | ?                              | x                                           | x                                             | NA                                          | ✓                           | NA                                                                        | ✓                                                | 45%                                                    |
| Drissi   | ✓                                  | ✓                              | x                           | ✓                            | x                              | x                                           | x                                             | NA                                          | x                           | x                                                                         | x                                                | 27%                                                    |
| Hooper   | ✓                                  | ✓                              | ?                           | ✓                            | ✓                              | ✓                                           | ✓                                             | ✓                                           | ✓                           | ✓                                                                         | ✓                                                | 91%                                                    |

✓: Yes; x: No; ?: Unclear; NA: Not applicable
